# Supplementary material for: Preparation and optical properties of Eu2+–Pr3+/Nd3+ co-doped CaAl2O4 long afterglow luminescent materials
Source: Royal Society of Chemistry journal article supplement (doi:10.1039/d3nj05121h), 2023-12-06
Supplement: d3nj05121h1.pdf [file d3nj05121h1.pdf]

## *Supporting Information*

### **Preparation and optical properties of Eu<sup>2+</sup>-Pr<sup>3+</sup>/Nd<sup>3+</sup> co-doped CaAl<sub>2</sub>O<sub>4</sub> long afterglow luminescent materials**

Ning Zhang<sup>a</sup>, Qingling Zeng<sup>a</sup>, Chunhua Yin<sup>a</sup>, Dongcai Guo<sup>a,b,\*</sup>

*a State Key Laboratory of Chemo/Biosensing and Chemometrics, College of Chemistry and Chemical Engineering, Hunan University, Changsha 410082, China*

*b Hunan Provincial Key Laboratory for Cost-effective Utilization of Fossil Fuel Aimed at Reducing Carbon-dioxide Emissions, Changsha 410082, China*

\* Corresponding Author: Dongcai Guo, E-mail address: dcguo2001@hnu.edu.cn (D. Guo),

Tel./fax: +86073188821449

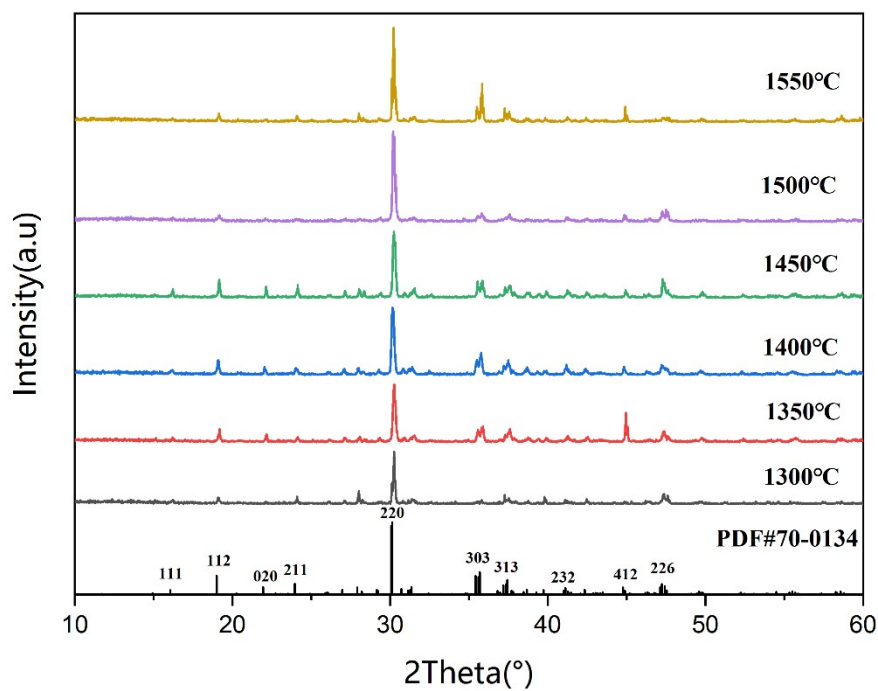

**Fig. S1.** XRD plots of samples at different calcination temperatures

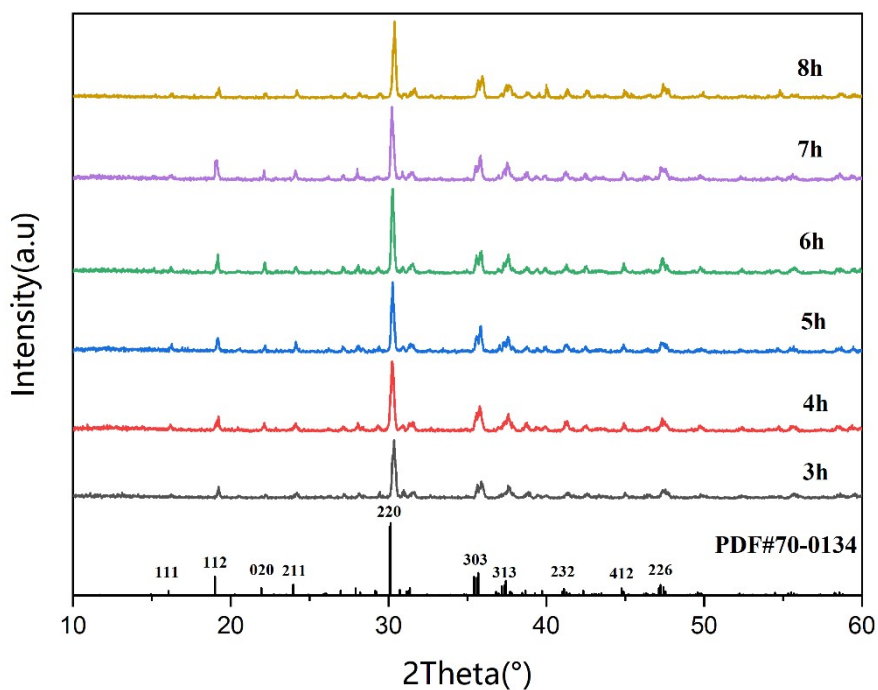

**Fig. S2.** XRD plots of samples at different calcination times

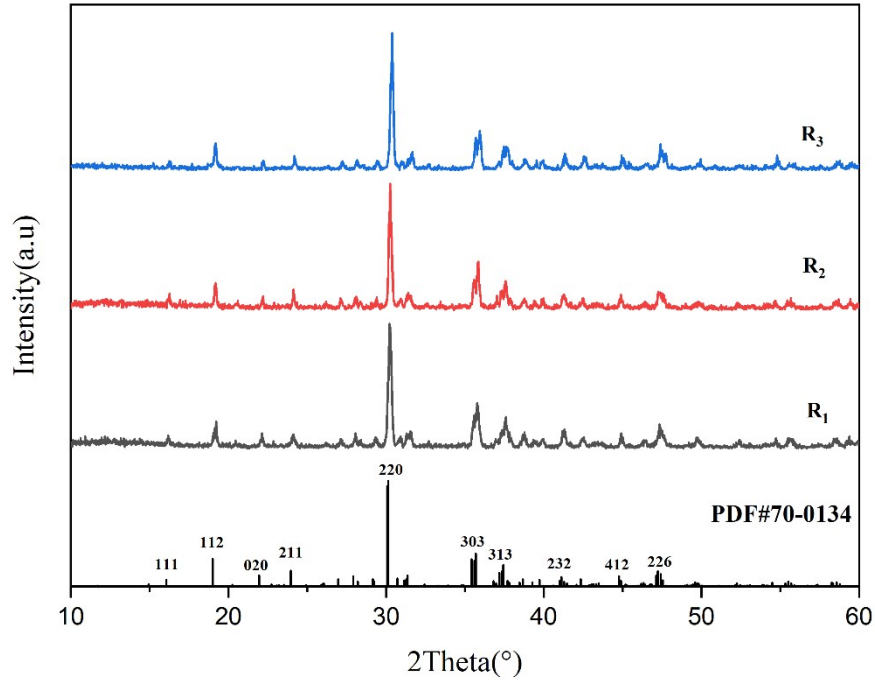

Fig. S3. XRD diagram of the target products R<sub>1</sub>, R<sub>2</sub> and R<sub>3</sub>

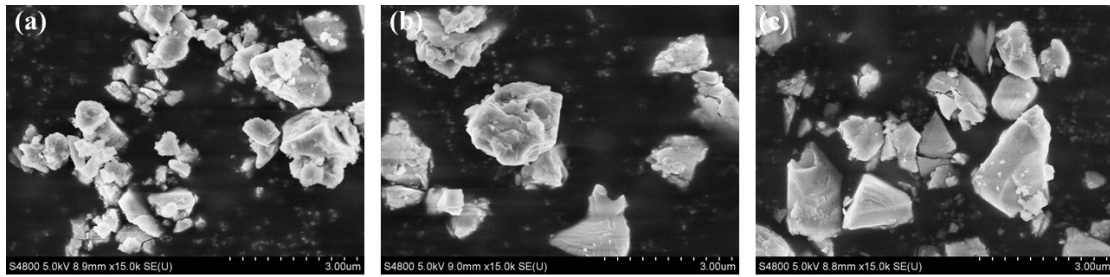

Fig. S4. SEM images of the samples (a) R<sub>1</sub>; (b) R<sub>2</sub>; (c) R<sub>3</sub>

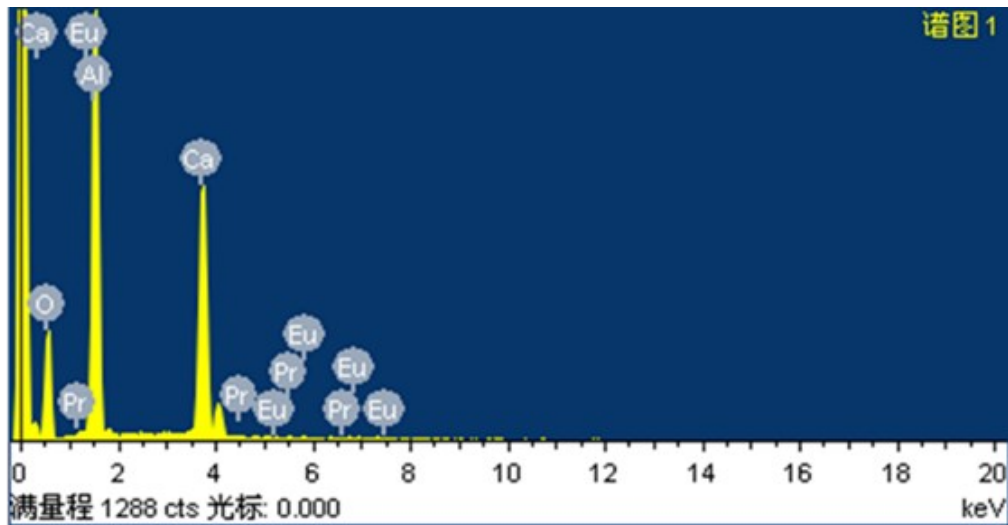

Fig. S5. EDS plot of sample R<sub>1</sub>

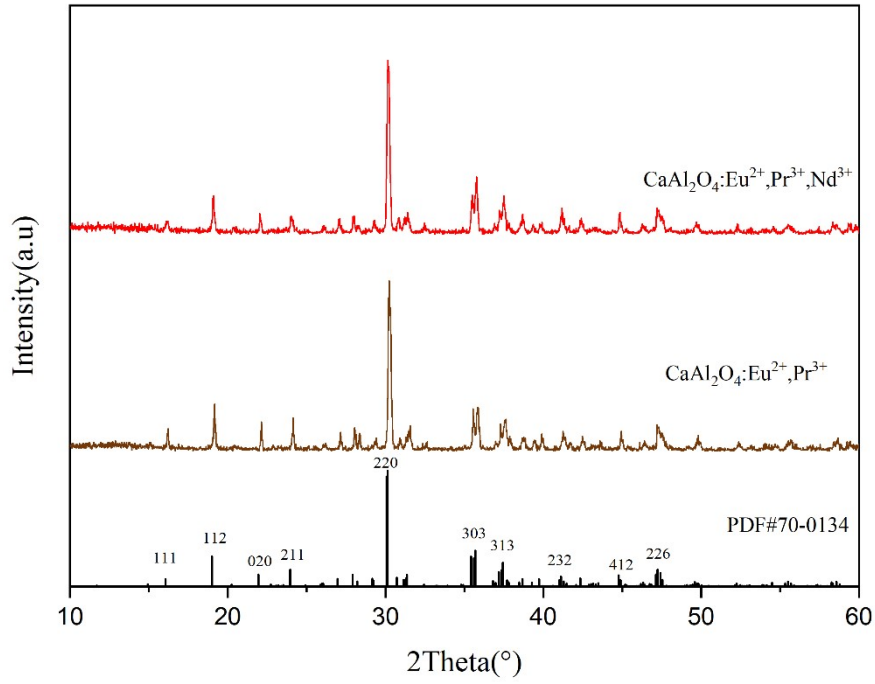

**Fig. S6.** XRD diagram of the samples

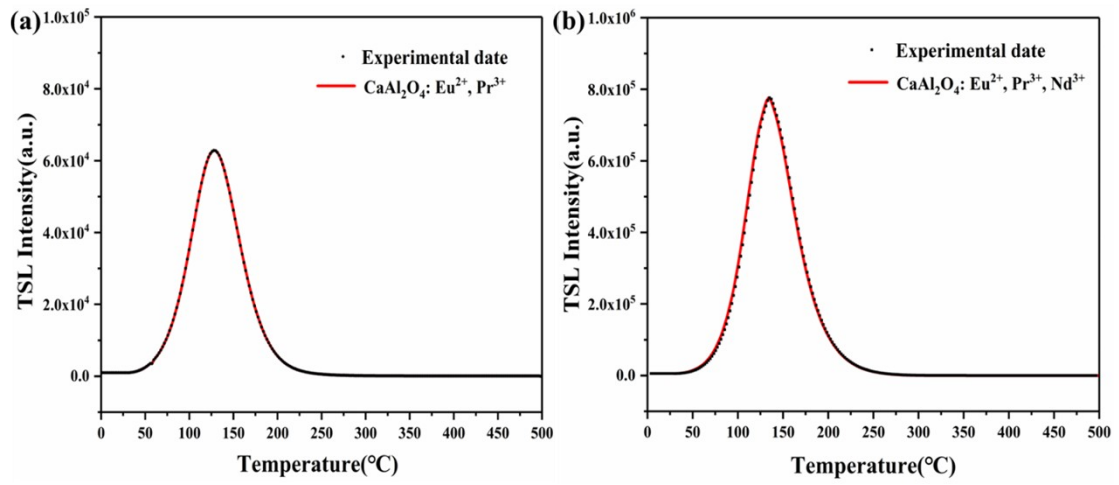

**Fig. S7.** TSL curves of samples (a)  $\text{CaAl}_2\text{O}_4: \text{Eu}^{2+}, \text{Pr}^{3+}$ ; (b)  $\text{CaAl}_2\text{O}_4: \text{Eu}^{2+}, \text{Pr}^{3+}, \text{Nd}^{3+}$ , red solid line is the fitted curve
